# Supplementary material for: Near room-temperature thermocatalysis: a promising avenue for the degradation of polyethylene using NiCoMnO4 powders
Source: Royal Society of Chemistry journal article supplement (doi:10.1039/c5ra16626h), 2016-01-01
Supplement: c5ra16626h1.pdf [file c5ra16626h1.pdf]

## Supporting Information

### **Near room temperature thermocatalysis: a promising avenue for the degradation of polyethylene using NiCoMnO<sub>4</sub> powders**

*Ke Li*<sup>a, c</sup>, *Juan Zhao*<sup>d</sup>, *Yu Zhang*<sup>b\*</sup>, *Pei Wu*<sup>a, c</sup>, *Zhenming Zhang*<sup>a, c</sup>

<sup>a</sup>*School of Material Science and Engineering, Southwest University of Science and Technology, Mianyang 621010, Sichuan, China*

<sup>b</sup>*Graduate School of Southwest University of Science and Technology, Mianyan 621010, Sichuan, China*

<sup>c</sup>*Engineering Research Center of Biomass Materials, Ministry of Education, Southwest University of Science and Technology, Mianyang 621010, Sichuan, China*

<sup>d</sup>*Key Open Laboratory of Veterinary Drug Safety Evaluation and Residues Research of Chinese Academy of Agricultural Science, Shanghai Veterinary Research Institute, CAAS, Shanghai 200241, China*

*\*Corresponding author. Tel.: +86-816-6089117; Fax: +86-816-6089117.*

*E-mail: zhangyu@swust.edu.cn (Y. Zhang); likesuifeng@hotmail.com (K. Li)*

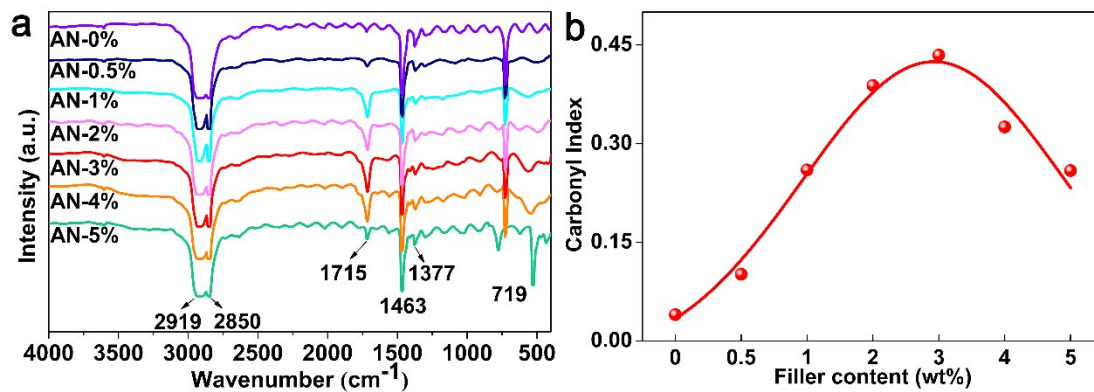

**Figure S1.** FTIR spectra (a) and C.I. graph (b) of physical mixtures with different catalyst content after aging at 50 °C in air for 90 days.

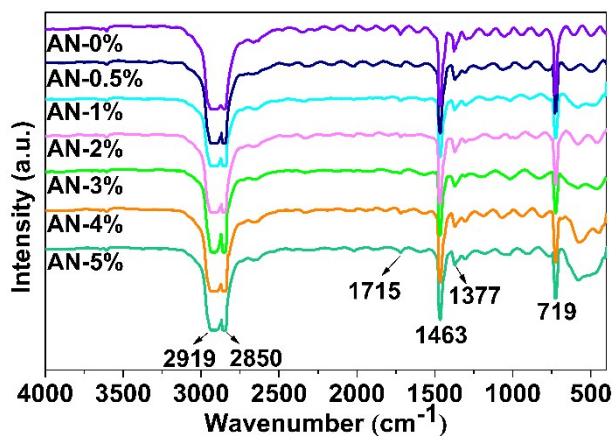

**Figure S2.** FTIR spectra of composite films with different catalyst dosage after aging at 20 °C in air for 90 days

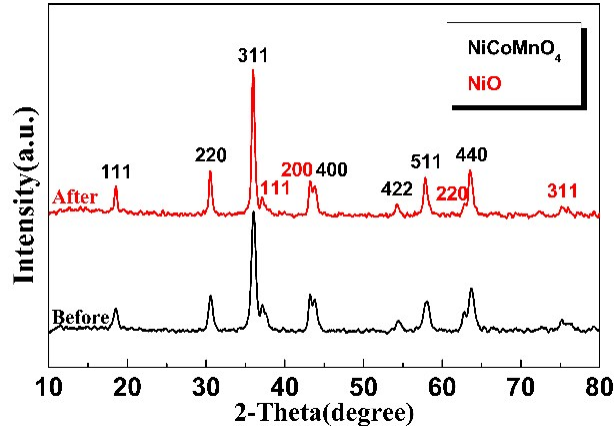

**Figure S3.** XRD pattern of catalyst before and after thermodegradation reaction

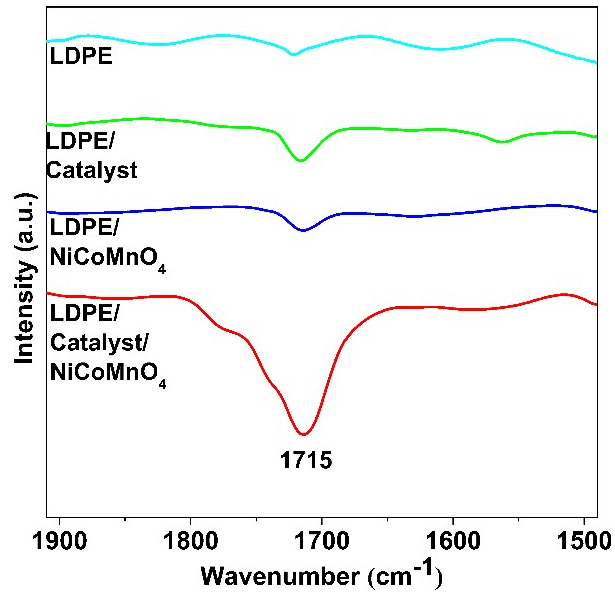

**Figure S4.** FT-IR spectra of composite films filled with NiCoMnO<sub>4</sub> and another specific catalyst after thermal degradation.

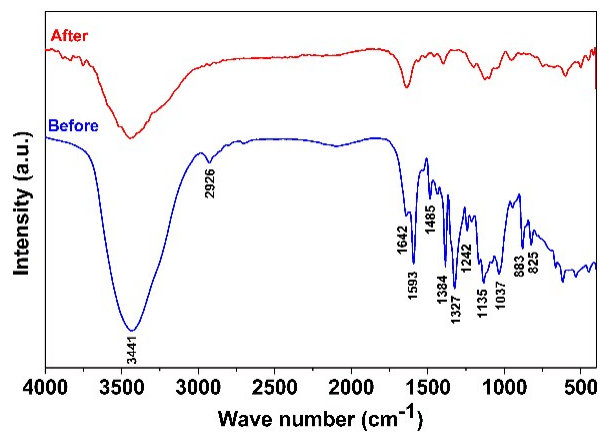

**Figure S5.** FT-IR spectra of methylene blue before and after thermal degradation by specific transition metal sulfide.
